# Supplementary material for: 3′,4′-Dihydroxyflavonol Modulates the Cell Cycle in Cancer Cells: Implication as a Potential Combination Drug in Osteosarcoma
Source: MDPI journal article supplement (doi:10.3390/ph14070640), 2021-07-03
Supplement: s1 [file s1]

## Supporting Information

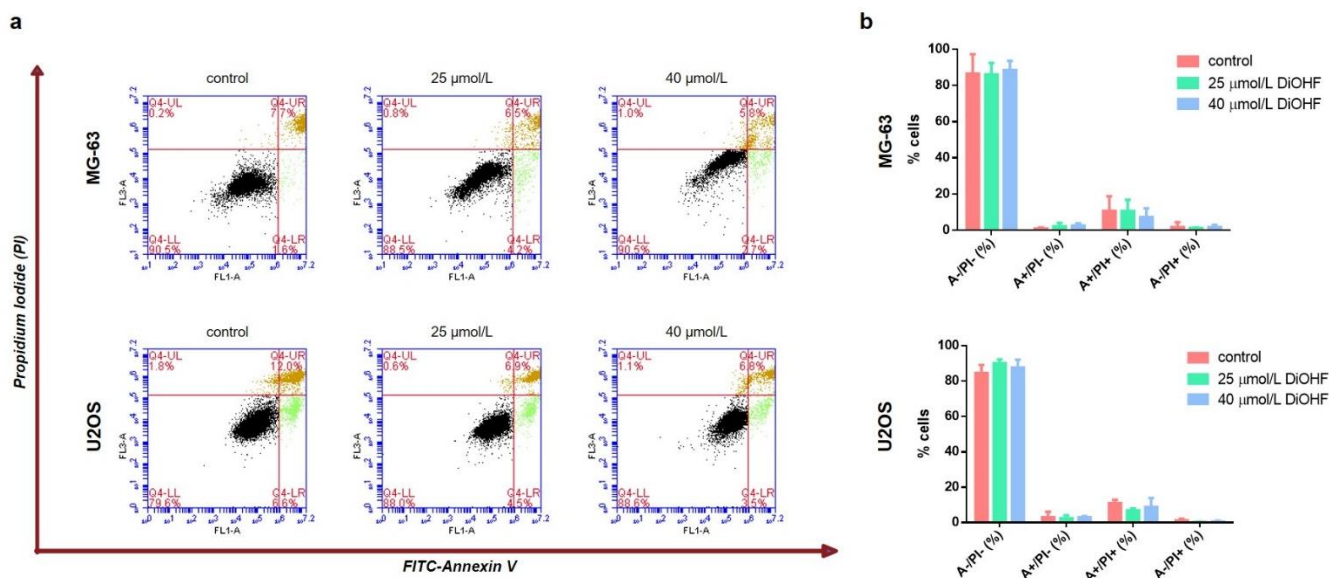

**Figure S1.** Effects of DiOHF on apoptosis. After 48h incubation with DiOHF, MG-63 and U2OS cells were harvested, incubated with FITC-annexin V and propidium iodide, and analysed by flow cytometry. a) representative dot plot diagrams of osteosarcoma cells labelled with FITC-annexin V (FL1) and propidium iodide (FL3); b) percentage of cells identified as FITC-annexin-V / PI: - / - (viable), + / - (early apoptotic), + / + (late apoptotic + necrotic) and - / + (necrotic). The data are mean  $\pm$  SD (N=3). No significant differences were detected (one-way ANOVA).

**Table S1.** Oligonucleotide primer sequences used for quantitative PCR.

| Gene                                             | Oligonucleotide primer sequence (5'-3')                   |
|--------------------------------------------------|-----------------------------------------------------------|
| CCNB2 (cyclin B2)                                | F:GTCGACCCTTGCCACTACAC;<br>R:CCTAGAACCTTCTGAGACAAGCA      |
| CCNE1 (cyclin E1)                                | F:CAGCCTTGGGACAATAATGC;<br>R:GAGGCTTGCACGTTGAGTTT         |
| CDK1 (cyclin-dependent kinase 1)                 | F:GGGTAGACACAAAACACTACAGGTCAA;<br>R:GGAATCCTGCATAAGCACATC |
| CDK2 (cyclin-dependent kinase 2)                 | F:ACCTCCCCTGGATGAAGATG;<br>R:AGATGGGGTACTGGCTTGGT         |
| GADPH (glyceraldehyde 3-phosphate dehydrogenase) | F:ACACCCACTCCTCCACCTTT;<br>R:TACTCCTTGGAGGCCATGTG         |
